# Supplementary material for: Meta-analysis of molecular response of kidney to ischemia reperfusion injury for the identification of new candidate genes
Source: BMC Nephrol. 2013 Oct 24;14:231. doi: 10.1186/1471-2369-14-231 (PMC4016589; doi:10.1186/1471-2369-14-231)
Supplement: Additional file 5 — List of interactive networks identified by the Ingenuity software. [file 1471-2369-14-231-S5.xlsx]

## Sheet: Sheet1
Before filtering (75 candidates)
24	solely rodent contribution (% of genes)
45.3333	human model contribution (% of genes)
Filtered out candidates
	KCTD1	MYADM	COL4A1	RIPK3	TPBG	RHOJ	MEP1A	PDLIM7	TACSTD2	SLC7A5	RELA	CAPN2	ARF6	GALNT11	PDLIM1	STAT3	PEA15	SIRT3	CKAP4	CFL1	PPP1R14B	ENO2	RNH1	SLC34A2	PSTPIP1	HCLS1	HSD17B2	NFIL3
Human	0	0	0	0	0	0	0	0	0	0	0	0	0	0	0	0	0	0	1	1	1	1	1	1	1	1	1	1
Pig	0	0	0	0	0	0	0	0	0	0	0	1	2	2	2	2	2	2	0	0	0	0	0	0	0	0	1	1
Mouse	5	5	5	5	5	6	6	6	6	6	6	5	5	5	5	5	6	6	4	4	5	5	5	5	6	6	5	6
Rat	5	7	7	7	9	4	5	6	6	8	9	7	6	7	8	8	5	6	7	9	6	7	8	8	5	6	10	7
sum	10	12	12	12	14	10	11	12	12	14	15	13	13	14	15	15	13	14	12	14	12	13	14	14	12	13	17	15
13.1071	average of significant experiments
39.2857	solely rodent contribution (% of genes)
35.7143	human model contribution (% of genes)
Final list of candidate
	CXCL10	VIM	CD68	BIRC3	EMP3	ICAM1	JUNB	FLNA	CD14	S100A11	S100A6	LGALS3	MAP4K4	IFRD1	UPB1	ANXA2	CD53	ITGB2	SPP1	TIMP1	TNFRSF12A	TYROBP	HMOX1	KLF6	CEBPD	ELF3	IER3	CAPG	JUN	CXCL1	RASD1	PHLDA1	SH3BGRL3	ATF3	EDN1	EGR2	LCN2	SOCS3	MYC	ADAMTS1	CCL2	CLDN4	ALOX5AP	CDKN1A	ARPC1B	ANXA1	CLU
Human	0	0	0	0	0	0	0	0	0	0	0	0	0	0	0	0	0	0	0	0	0	0	0	1	1	1	1	1	1	1	1	1	1	1	1	1	1	1	1	1	1	1	1	1	1	1	1
Pig	0	0	0	0	0	0	0	1	1	1	1	1	2	2	2	2	2	2	2	2	2	2	2	0	0	0	0	0	0	0	0	0	0	0	0	0	0	1	2	2	2	2	2	2	2	2	2
Mouse	5	5	6	6	6	6	6	6	6	6	6	6	4	5	5	5	6	6	6	6	6	6	6	2	5	5	5	5	5	6	6	6	6	6	6	6	6	6	3	4	5	6	6	6	6	6	6
Rat	9	9	6	7	8	9	9	7	8	8	8	10	7	3	7	9	6	7	8	8	8	8	11	9	3	6	6	7	8	7	7	8	8	9	9	9	11	7	8	10	9	6	7	7	8	10	10
sum	14	14	12	13	14	15	15	14	15	15	15	17	13	10	14	16	14	15	16	16	16	16	19	12	9	12	12	13	14	14	14	15	15	16	16	16	18	15	14	17	17	15	16	16	17	19	19
14.8723	average of significant experiments
14.8936	solely rodent contribution (% of genes)
51.0638	human model contribution (% of genes)
